# Supplementary material for: A green extraction process for the selective recovery of Sc(iii) based on hydrophobic betaine derivative ionic liquids
Source: Royal Society of Chemistry journal article supplement (doi:10.1039/d3ra08238e), 2024-01-01
Supplement: d3ra08238e1.pdf [file d3ra08238e1.pdf]

## Supplementary material

### Green extraction process for the selective recovery of Sc(III) based on hydrophobic betaine derivatives ionic liquids

Xiang Su, Huipeng Liu\* and Gang Tian

School of Chemistry and Environmental Engineering, Pingdingshan University, Pingdingshan,  
Henan 467000, PR China.

E-mail:m13526718841@163.com

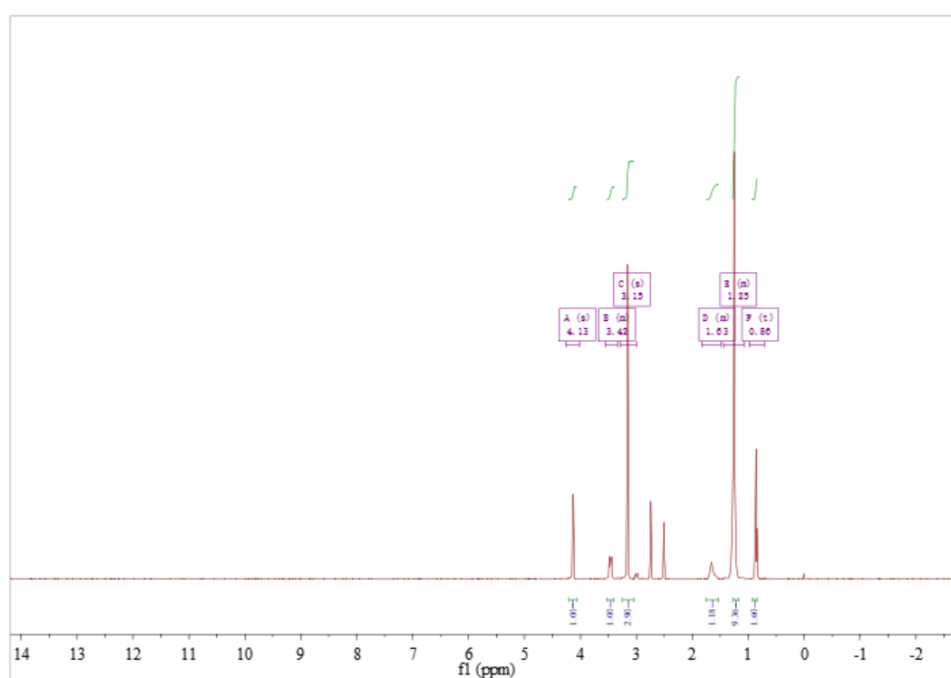

**Fig. S1** <sup>1</sup>H NMR spectrum of [Laur][Tf<sub>2</sub>N].

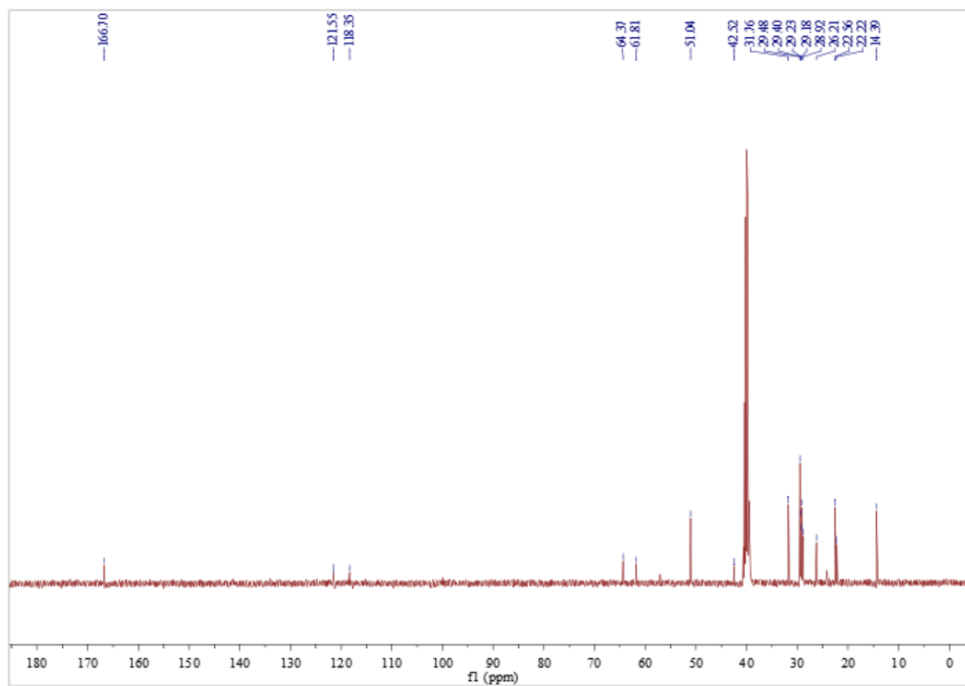

**Fig. S2**  $^{13}\text{C}$  NMR spectrum of [Laur][Tf<sub>2</sub>N].

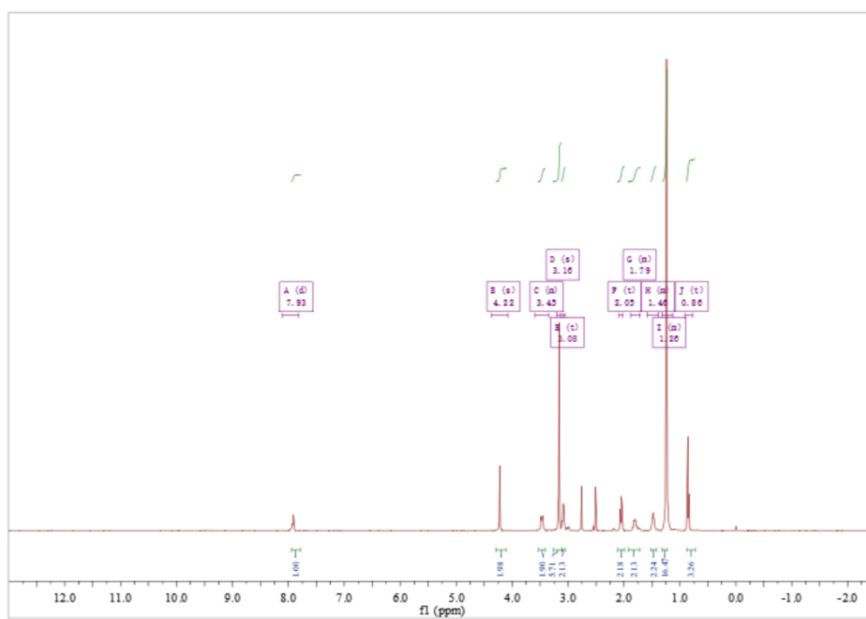

**Fig. S3**  $^1\text{H}$  NMR spectrum of [Coca][Tf<sub>2</sub>N].

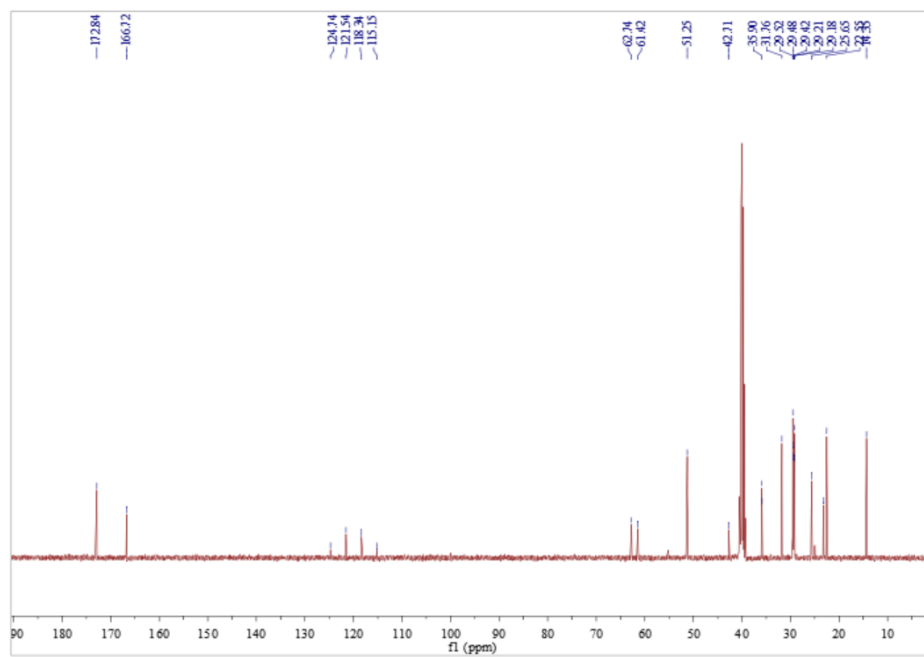

**Fig. S4**  $^{13}\text{C}$  NMR spectrum of [Coca][Tf<sub>2</sub>N].
